# Supplementary material for: NIL10: A New IL10-Receptor Binding Nanoparticle That Induces Cardiac Protection in Mice and Pigs Subjected to Acute Myocardial Infarction through STAT3/NF-κB Activation
Source: MDPI journal article supplement (doi:10.3390/pharmaceutics14102044), 2022-09-26
Supplement: s1 [file s1]

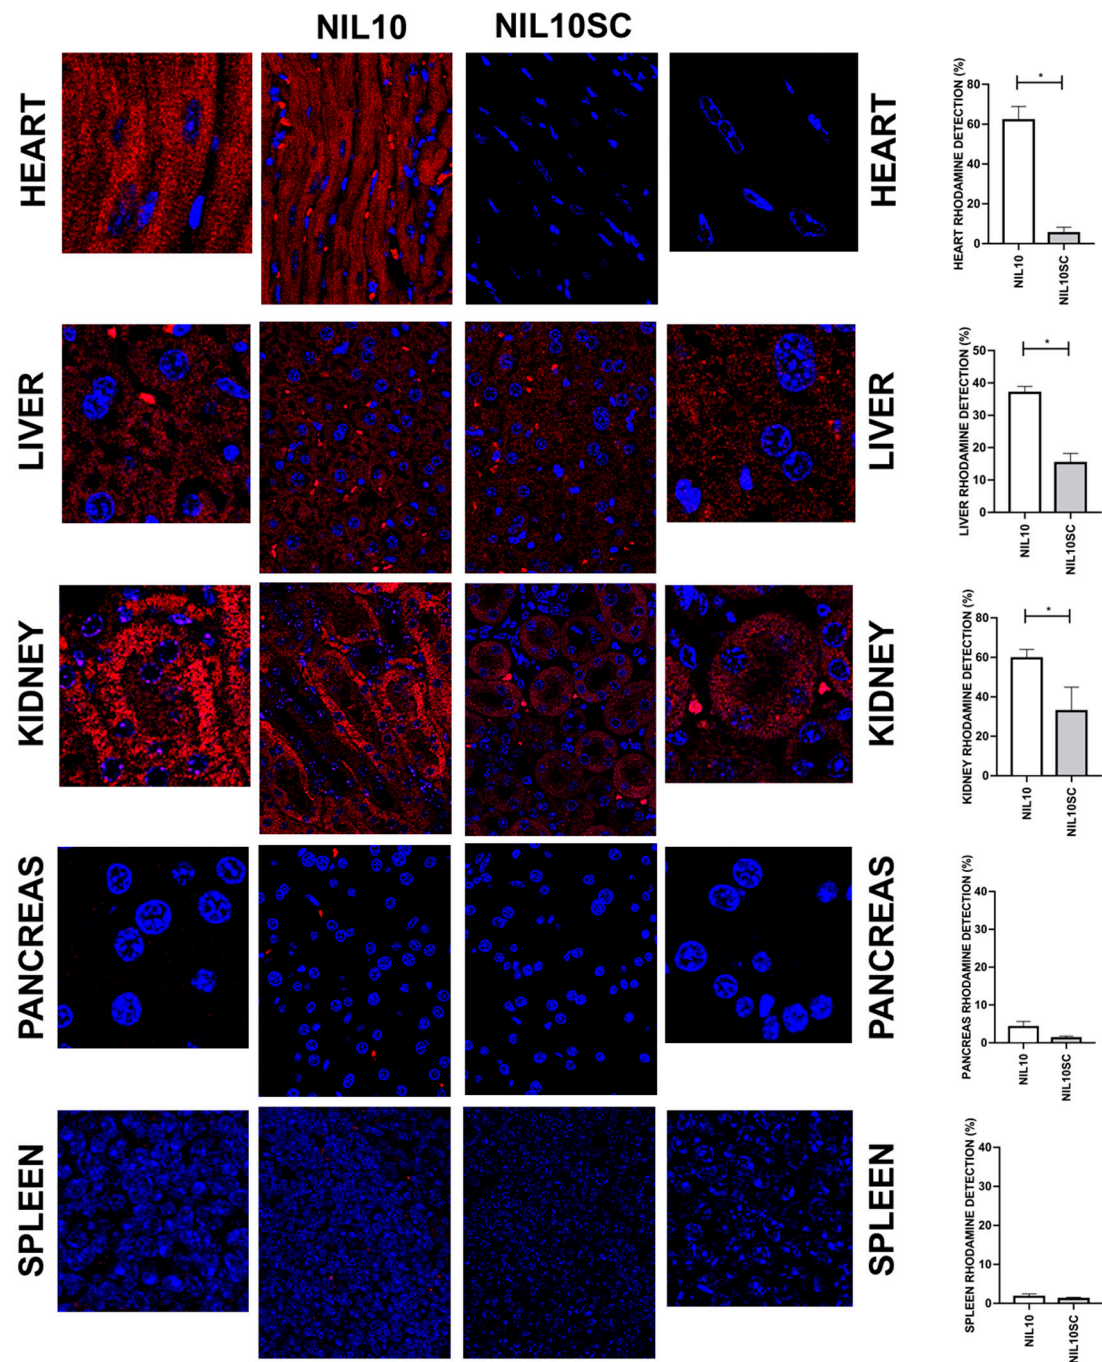

**Supplementary Figure S1. Biodistribution of NIL10 and NIL10SC.** Confocal microscopy detection of 1 mg/kg NIL10 and NIL10SC in the heart, liver, kidney pancreas, and spleen of healthy animals by day 7 after IV injection (N=10 mice/group).

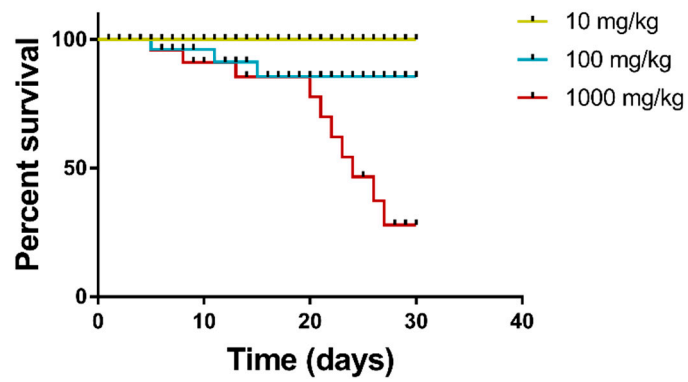

**Supplementary Figure S2.** Kaplan Meier curve showing the percentage of survival of healthy mice injected with the doses indicated of NIL10 (N=5mice/condition).

| Inflammatory | Anti-inflammatory | Chemokines    |
|--------------|-------------------|---------------|
| C5a          | IL1-RA            | CXCL1         |
| G-CSF        | IL-4              | CXCL2         |
| GM-CSF       | IL-5              | CXCL3         |
| CCL1         | IL-7              | CXCL9         |
| CCL11        | IL-10             | CXCL10        |
| sICAM-1      | IL-11             | CXCL11        |
| IFN-gamma    | IL-13             | CXCL12        |
| IL1-alpha    | IL-16             | CCL2          |
| IL1-beta     | IL27              | CCL3          |
| IL-2         |                   | CCL4          |
| IL-3         |                   | CCL5 (RANTES) |
| IL-6         |                   | CCL12         |
| IL12-P70     |                   | CCL17         |
| IL-17        |                   |               |
| IL-23        |                   |               |
| TNF-ALPHA    |                   |               |
| TREM-1       |                   |               |
| MCSF         |                   |               |

**Suppelemntary Figure S3.** Cytokine array used in the study.

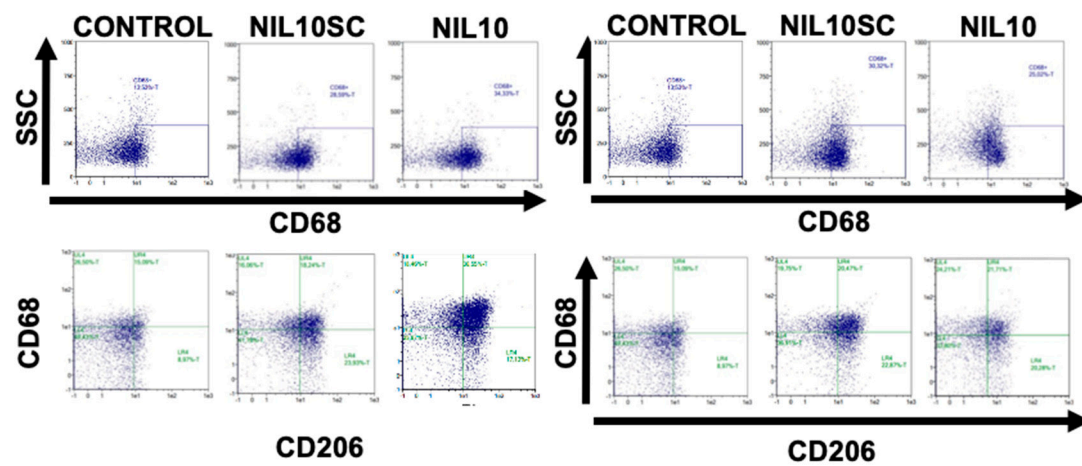

**Supplementary Figure S4.** Gating strategy used to identify macrophage-cell subsets in the healthy and infarcted mice heart. A sequential gating strategy was first used to identify M2 population expressing specific macrophage marker CD68, followed by the identification of the population with overlapping expression patterns (CD68/CD206).
